# Supplementary material for: Versatile Fe2GeS4 for Li/Na–Fe2GeS4 battery cathodes and Li/Na-ion battery anodes
Source: Royal Society of Chemistry journal article supplement (doi:10.1039/d2ta06471e), 2022-01-01
Supplement: d2ta06471e1.pdf [file d2ta06471e1.pdf]

**Supplementary Information for**

# Versatile $\text{Fe}_2\text{GeS}_4$ for Li/Na– $\text{Fe}_2\text{GeS}_4$ battery cathodes and Li/Na–ion battery anodes

*Vinoth Ganesan,<sup>‡a</sup> Ki-Hun Nam,<sup>‡a,b</sup> Jae-Hun Kim<sup>\*c</sup> and Cheol-Min Park<sup>\*a,b</sup>*

*<sup>a</sup> School of Materials Science and Engineering, Kumoh National Institute of Technology, Gumi, Gyeongbuk 39177, Republic of Korea*

*<sup>b</sup> Department of Energy Engineering Convergence, Kumoh National Institute of Technology, Gumi, Gyeongbuk 39177, Republic of Korea*

*<sup>c</sup> School of Materials Science and Engineering, Kookmin University, Seoul 02707, Republic of Korea*

*<sup>‡</sup> These authors contribute equally to this work.*

*<sup>\*</sup> Corresponding authors*

*E-mail: jaehunkim@kookmin.ac.kr (J.-H. Kim), cmpark@kumoh.ac.kr (C.-M. Park)*

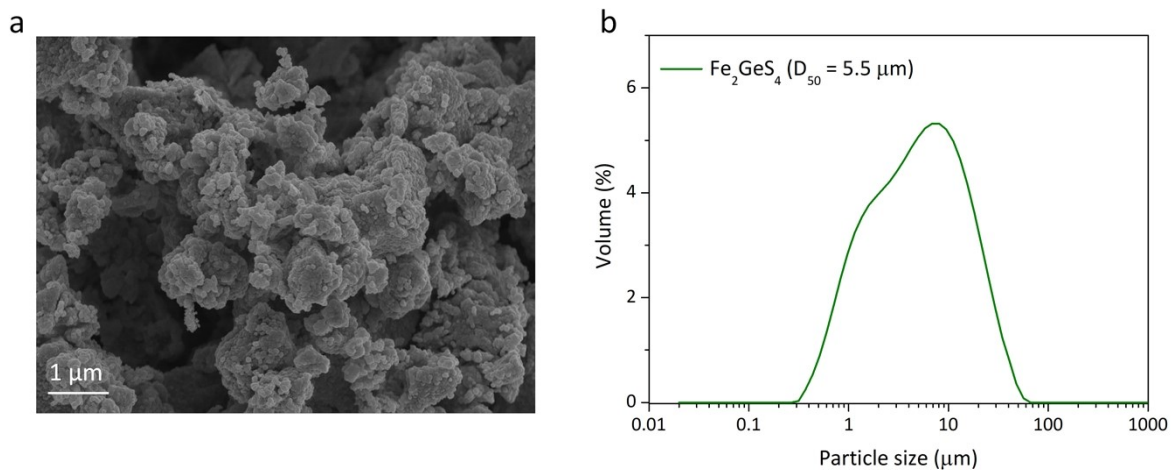

**Fig. S1** (a) SEM image and (b) PSA result of the  $\text{Fe}_2\text{GeS}_4$ .

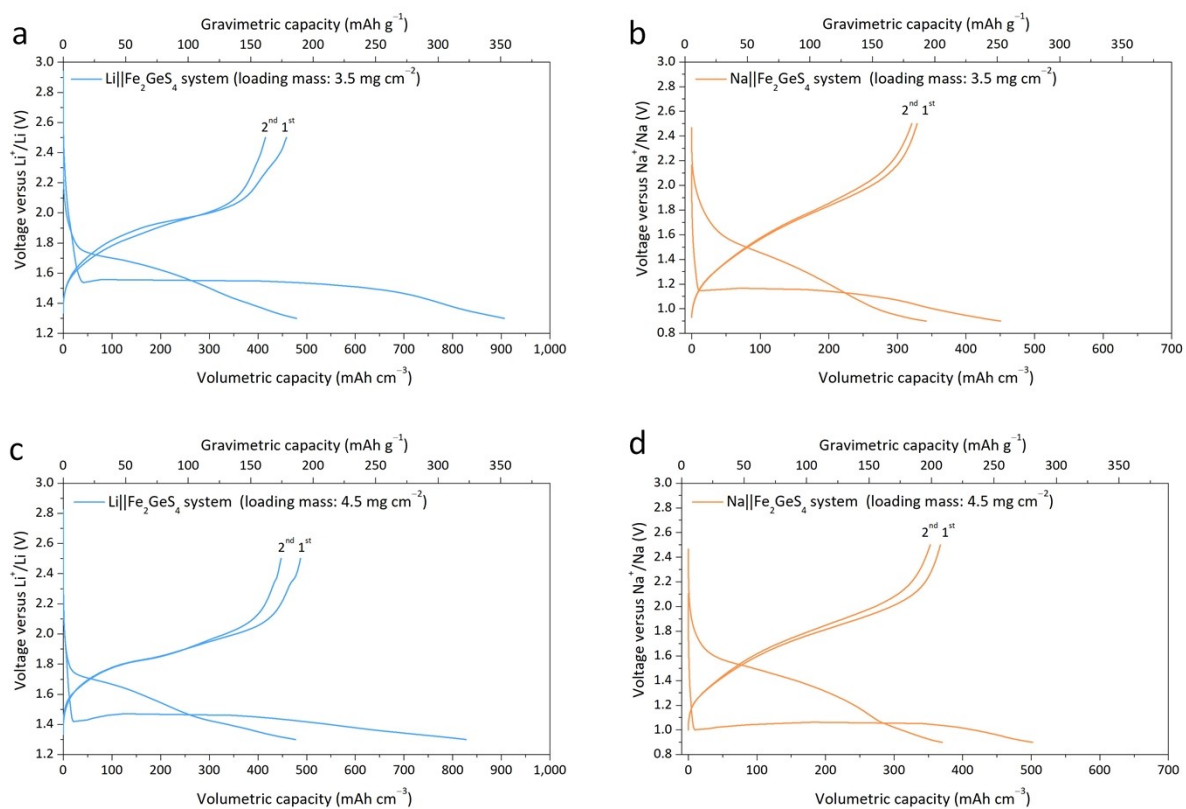

**Fig. S2** Electrochemical behavior of  $\text{Fe}_2\text{GeS}_4$  cathodes at various loading levels of the electrode. Voltage profiles of (a)  $\text{Li}||\text{Fe}_2\text{GeS}_4$  and (b)  $\text{Na}||\text{Fe}_2\text{GeS}_4$  systems at the loading of  $3.5\ \text{mg cm}^{-2}$ . Voltage profiles of (c)  $\text{Li}||\text{Fe}_2\text{GeS}_4$  and (d)  $\text{Na}||\text{Fe}_2\text{GeS}_4$  systems at the loading of  $4.5\ \text{mg cm}^{-2}$ .

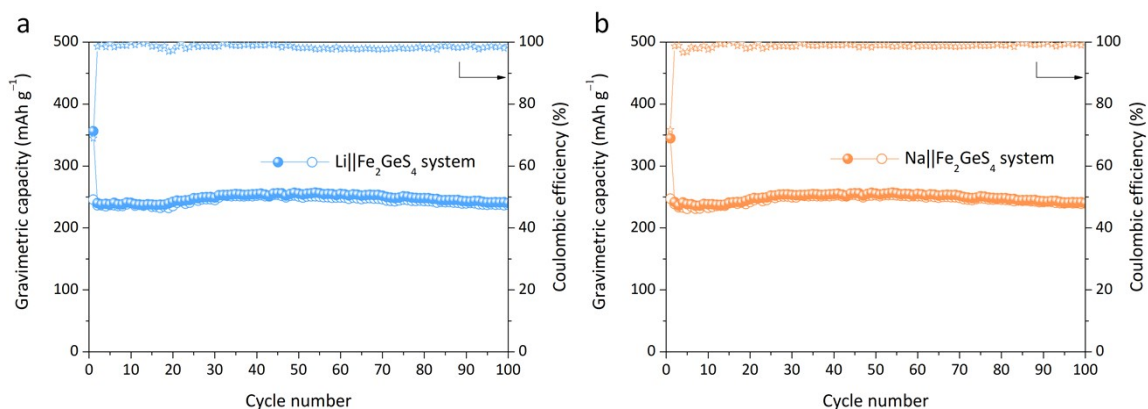

**Fig. S3** Cycling performance of (a) Li||Fe<sub>2</sub>GeS<sub>4</sub> system (cycling rate: 100 mA g<sup>-1</sup>) and (b) Na||Fe<sub>2</sub>GeS<sub>4</sub> system (cycling rate: 50 mA g<sup>-1</sup>).

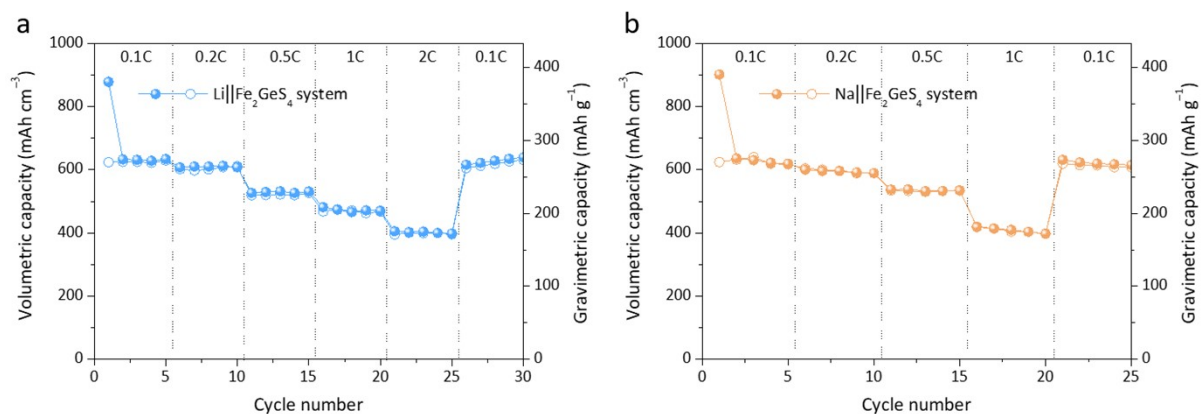

**Fig. S4** Rate capability results of Fe<sub>2</sub>GeS<sub>4</sub> cathode for Li||Fe<sub>2</sub>GeS<sub>4</sub> and Na||Fe<sub>2</sub>GeS<sub>4</sub> systems. High-rate cycling performance of (a) Li||Fe<sub>2</sub>GeS<sub>4</sub> at various rates (1C: 250 mA g<sup>-1</sup>) and (b) Na||Fe<sub>2</sub>GeS<sub>4</sub> at various rates (1C: 250 mA g<sup>-1</sup>).

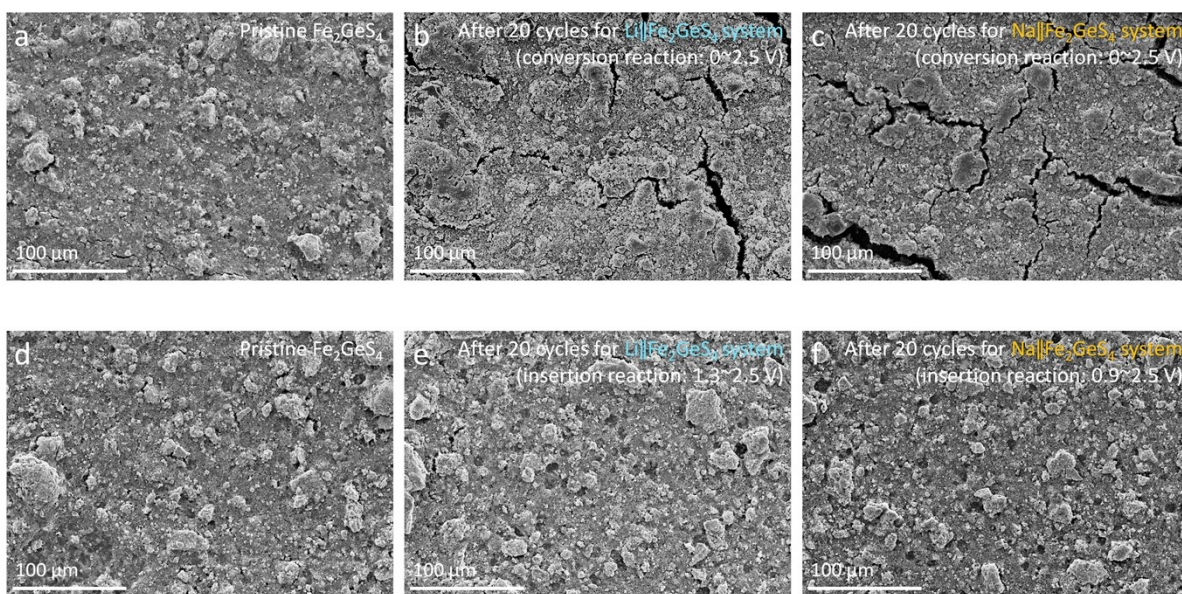

**Fig. S5 Morphological stability of  $\text{Fe}_2\text{GeS}_4$  cathode in  $\text{Li}||\text{Fe}_2\text{GeS}_4$  and  $\text{Na}||\text{Fe}_2\text{GeS}_4$  systems.** *Ex situ* SEM images of  $\text{Fe}_2\text{GeS}_4$  electrode (a) before cycle and (b, c) after 20 cycles in the conversion reaction voltage range (0–2.5 V) for (b)  $\text{Li}||\text{Fe}_2\text{GeS}_4$  and (c)  $\text{Na}||\text{Fe}_2\text{GeS}_4$ . *Ex situ* SEM images of (d) before cycle and (e, f) after 20 cycles in the insertion reaction voltage range for (e)  $\text{Li}||\text{Fe}_2\text{GeS}_4$  (1.3–2.5 V) and (f)  $\text{Na}||\text{Fe}_2\text{GeS}_4$  (0.9–2.5 V).

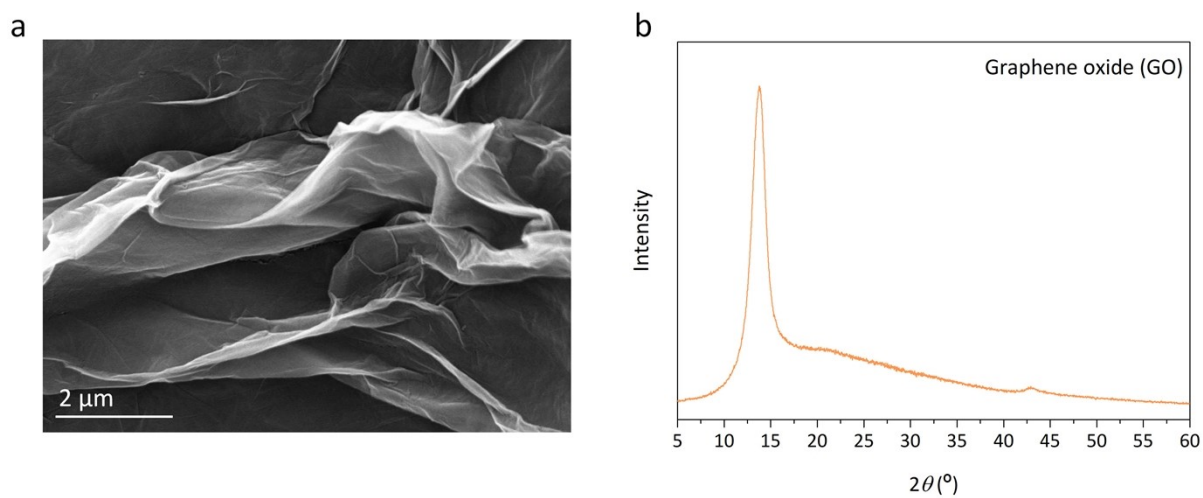

**Fig. S6** (a) SEM image and (b) XRD pattern of graphene oxide (GO).

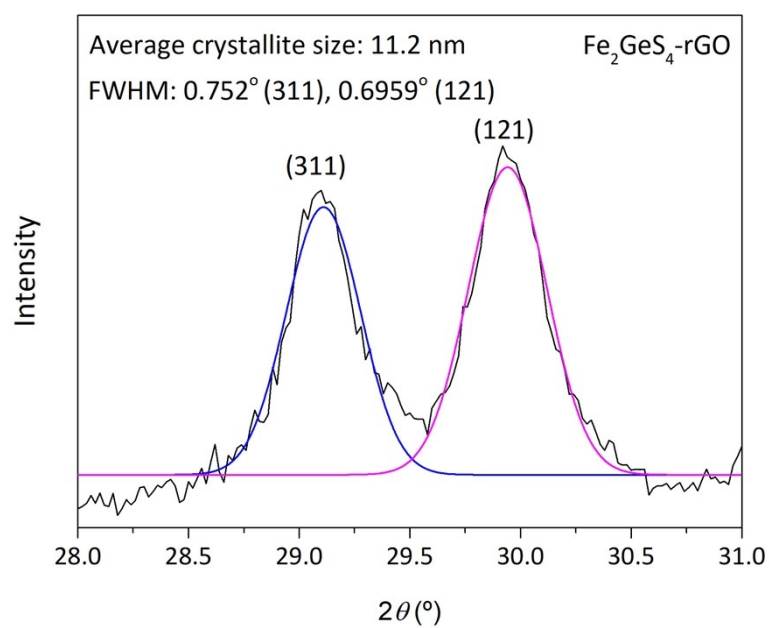

**Fig. S7** Average crystallite size of  $\text{Fe}_2\text{GeS}_4\text{-rGO}$  calculated using (311) and (121) planes of the XRD result.

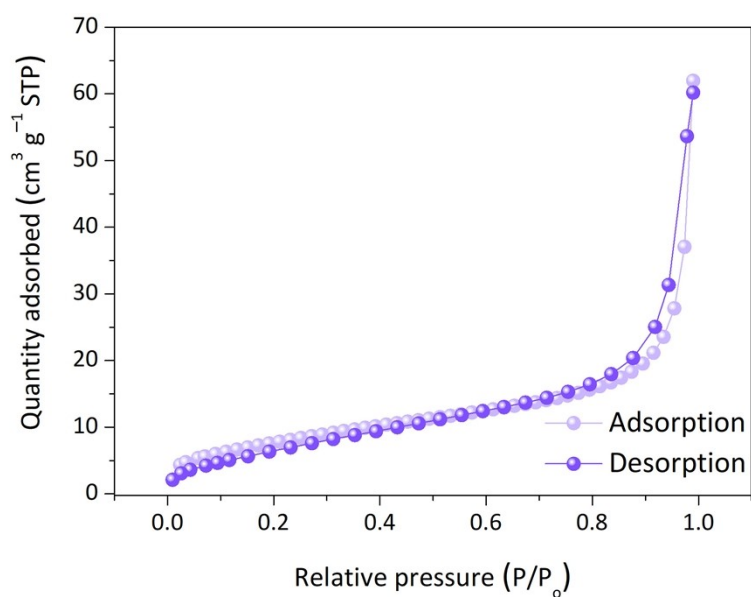

**Fig. S8**  $\text{N}_2$  adsorption–desorption isotherm plot for  $\text{Fe}_2\text{GeS}_4$ .

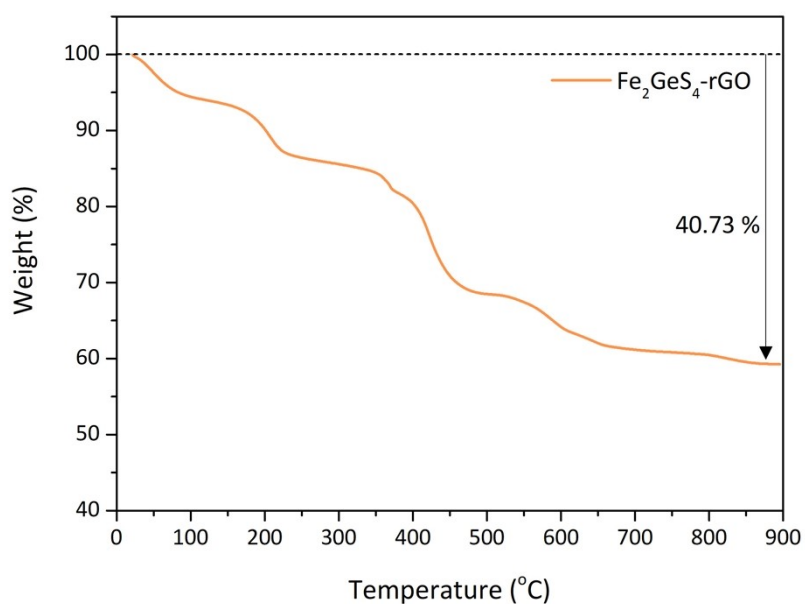

**Fig. S9** TGA curve of Fe<sub>2</sub>GeS<sub>4</sub>-rGO obtained in air atmosphere from room temperature to 900 °C at a rate of 10 °C min<sup>-1</sup>.

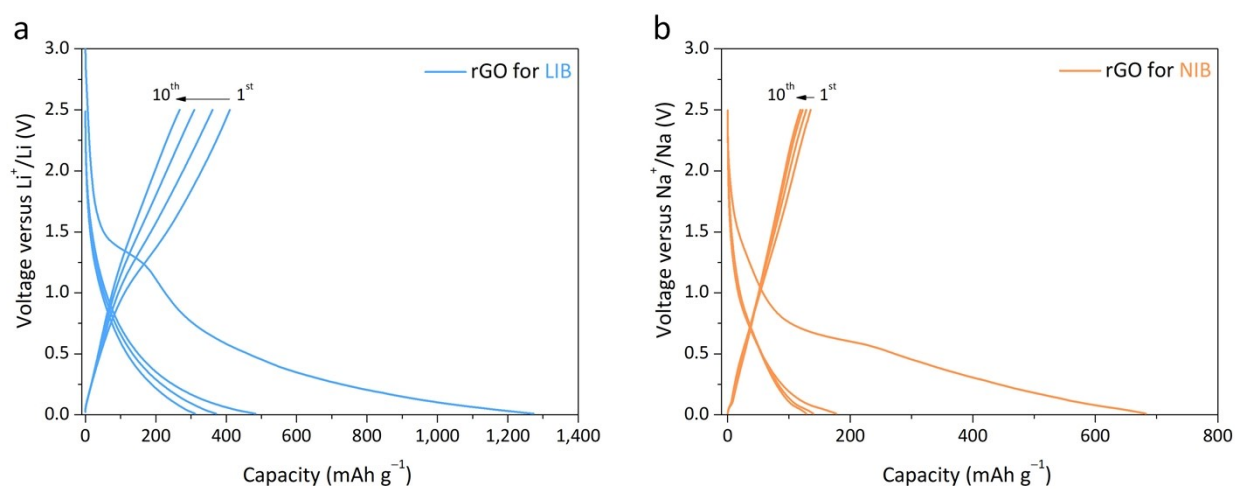

**Fig. S10 Electrochemical behavior of rGO.** Voltage profiles of rGO for (a) LIB (current density: 100 mA g<sup>-1</sup>) and (b) NIB (current density: 50 mA g<sup>-1</sup>).

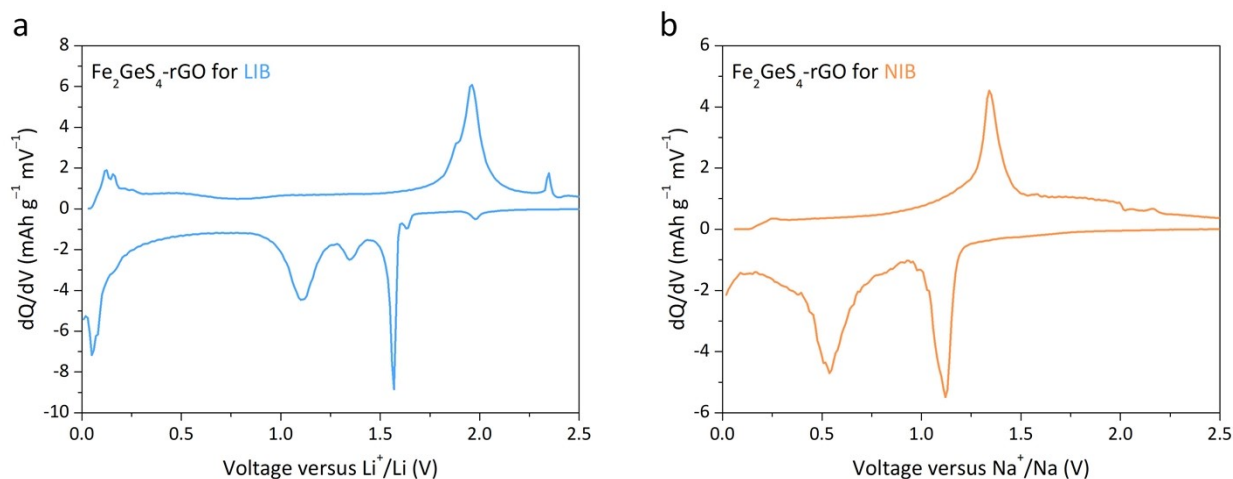

**Fig. S11**  $dQ/dV$  plots of  $\text{Fe}_2\text{GeS}_4$ -rGO for (a) LIB and (b) NIB.

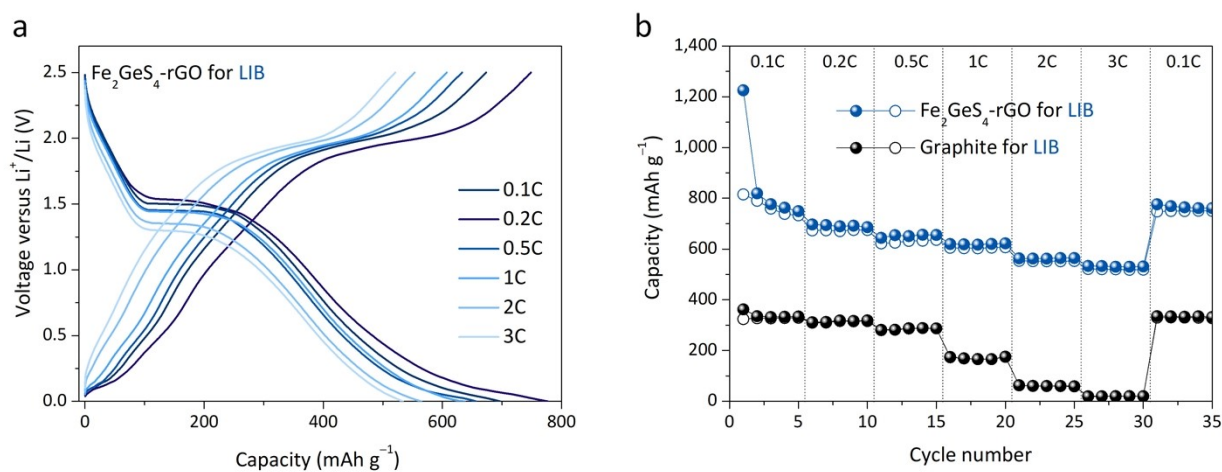

**Fig. S12** Li-rate capability results of  $\text{Fe}_2\text{GeS}_4$ -rGO. (a) Voltage profiles at various rates of  $\text{Fe}_2\text{GeS}_4$ -rGO. (b) Cycling performance of  $\text{Fe}_2\text{GeS}_4$ -rGO at various rates (1C:  $730 \text{ mA g}^{-1}$ ) and graphite (1C:  $320 \text{ mA g}^{-1}$ ).

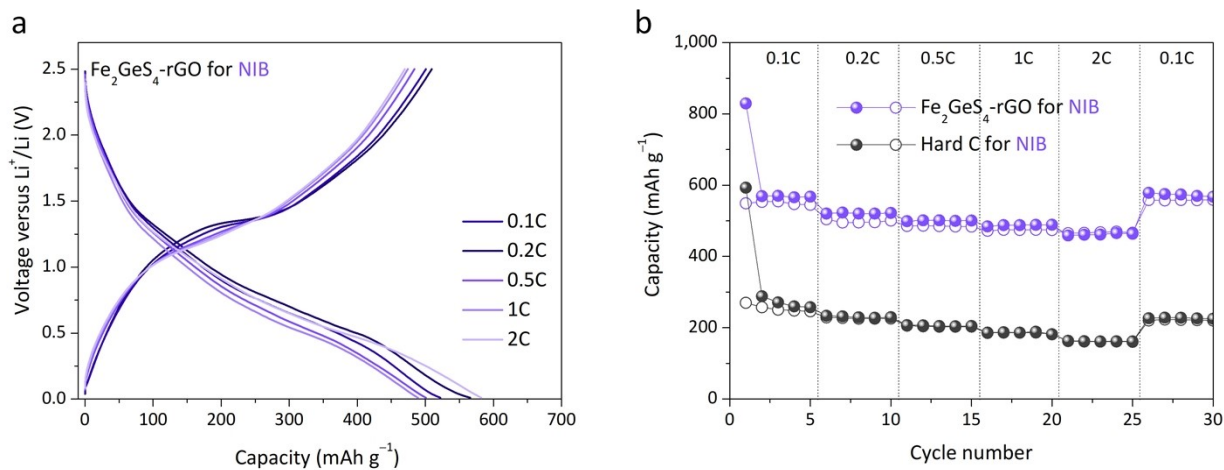

**Fig. S13 Na-rate capability results of Fe<sub>2</sub>GeS<sub>4</sub>-rGO.** (a) Voltage profiles at various rates of Fe<sub>2</sub>GeS<sub>4</sub>-rGO. (b) Cycling performance of Fe<sub>2</sub>GeS<sub>4</sub>-rGO at various rates (1C: 560 mA g<sup>-1</sup>) and hard-C (1C: 250 mA g<sup>-1</sup>).



**Table S1. Lattice constants and atomic parameters of Fe<sub>2</sub>GeS<sub>4</sub> refined from XRD result**

| Fe <sub>2</sub> GeS <sub>4</sub>                   |              |           |           |                             |        |
|----------------------------------------------------|--------------|-----------|-----------|-----------------------------|--------|
| Space group: Pnma, Orthorhombic                    |              |           |           |                             |        |
| Mw = 312.32 g/mol                                  |              |           |           | R <sub>bragg</sub> = 7.794% |        |
| a = 12.4708(4) Å, b = 7.2222(3) Å, c = 5.9050(1) Å |              |           |           | R <sub>p</sub> = 18.4%      |        |
| V = 531.84(3) Å <sup>3</sup>                       |              |           |           | R <sub>wp</sub> = 15.1%     |        |
| Density: 3.903 g/cm <sup>3</sup>                   |              |           |           | χ <sup>2</sup> = 9.55       |        |
| Atom                                               | Wyckoff site | X         | Y         | Z                           | Occ    |
| Fe (1)                                             | 4a           | 0         | 0         | 0                           | 0.3433 |
| Fe (2)                                             | 4c           | 0.2266(6) | 0.25      | 0.5053(6)                   | 0.3837 |
| Ge                                                 | 4c           | 0.4412(6) | 0.25      | 0.0803(2)                   | 0.3797 |
| S (1)                                              | 4c           | 0.4012(3) | 0.25      | 0.7181(8)                   | 0.3402 |
| S (2)                                              | 4c           | 0.5774(3) | 0.25      | 0.2345(2)                   | 0.3683 |
| S (3)                                              | 8d           | 0.3368(1) | 0.0099(5) | 0.2497(5)                   | 0.7807 |

**Table S2. Theoretical capacity of Fe<sub>2</sub>GeS<sub>4</sub>**

| Battery system | Gravimetric capacity | <sup>1</sup> Volumetric capacity | <sup>2</sup> Volumetric capacity |
|----------------|----------------------|----------------------------------|----------------------------------|
|                | [mAh/g]              | [mAh/cm <sup>3</sup> ]           | [mAh/cm <sup>3</sup> ]           |
| Li-ion storage | 1008                 | 3934                             | 2328                             |
| Na-ion storage | 772                  | 3013                             | 1783                             |

<sup>1</sup>: gravimetric capacity × density, <sup>2</sup>: gravimetric capacity × tap density

Density: 3.903 g/cm<sup>3</sup>, Tap density: 2.31 g/cm<sup>3</sup>
